# Supplementary material for: Association between Survival and Time of On-Scene Resuscitation in Refractory Out-of-Hospital Cardiac Arrest: A Cross-Sectional Retrospective Study
Source: PubMed Central journal article supplement (PMC7826551; doi:10.3390/ijerph18020496), 2021-01-09
Supplement: ijerph-18-00496-s001.pdf [file ijerph-18-00496-s001.pdf]

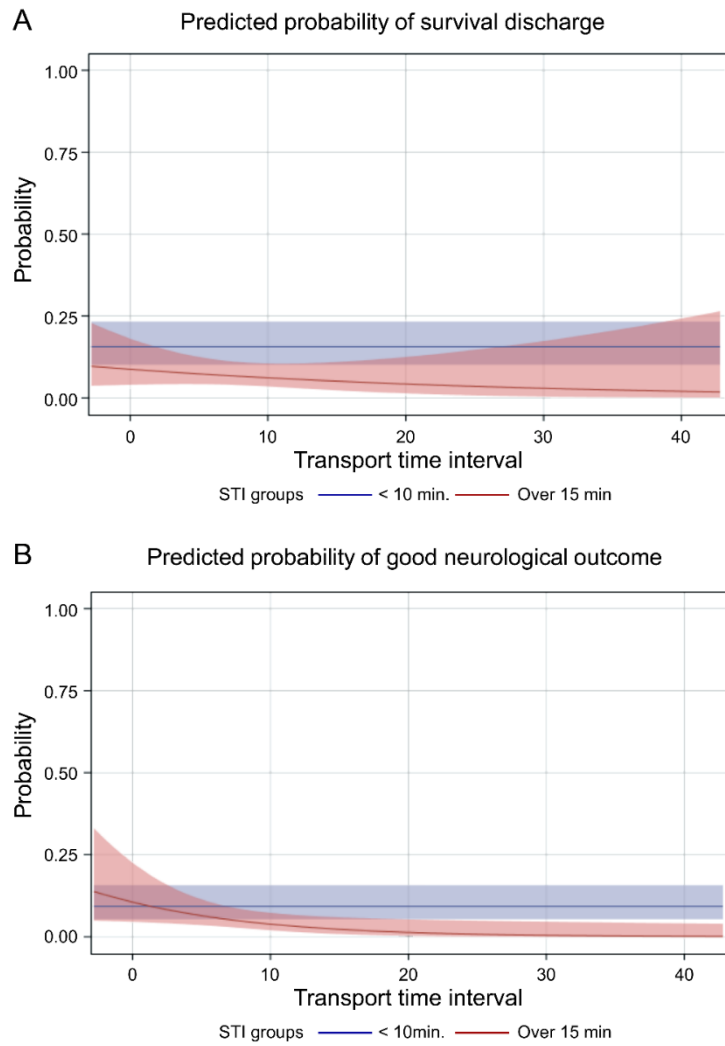

**Figure S1.** Interaction effects between transport time intervals and scene time interval (STI) groups on survival discharge and good neurological outcome with 95% confidence intervals.

**Table S1.** Multivariable logistic regression analysis for outcomes in without prehospital ROSC patients.

| Variables                    | Survival discharge |             |      |             | Good neurological outcome |             |      |             |
|------------------------------|--------------------|-------------|------|-------------|---------------------------|-------------|------|-------------|
|                              | OR                 | 95% CI      | aOR  | 95% CI      | OR                        | 95% CI      | aOR  | 95% CI      |
| STI ≥ 15 min (< 15 min)      | 0.52               | (0.23-1.18) | 0.45 | (0.18-1.16) | 0.80                      | (0.31-2.11) | 0.38 | (0.22-0.67) |
| Age, years                   | 0.96               | (0.93-0.99) | 0.95 | (0.92-0.98) | 0.95                      | (0.92-0.98) | 0.95 | (0.94-0.97) |
| Male                         | 1.17               | (0.38-3.59) | 1.13 | (0.32-3.98) | 1.05                      | (0.29-3.81) | 0.60 | (0.30-1.22) |
| Bystander CPR done           | 0.48               | (0.21-1.10) | 0.62 | (0.26-1.49) | 0.75                      | (0.28-1.96) | 1.23 | (0.71-2.15) |
| Public location (non-public) | 0.97               | (0.43-2.20) | 0.78 | (0.31-1.97) | 1.46                      | (0.56-3.84) | 1.36 | (0.78-2.38) |
| RTI, minute                  | 0.92               | (0.80-1.06) | 0.89 | (0.75-1.05) | 0.97                      | (0.83-1.13) | 0.88 | (0.79-0.98) |

|                                          |      |              |      |             |      |             |      |             |
|------------------------------------------|------|--------------|------|-------------|------|-------------|------|-------------|
| TTI, minute                              | 1.02 | (0.98-1.07)  | 1.03 | (0.98-1.08) | 1.04 | (0.99-1.09) | 1.04 | (1.01-1.07) |
| Supraglottic airway (bag valve mask)     | 0.51 | (0.19-1.35)  | 0.55 | (0.19-1.59) | 0.50 | (0.16-1.58) | 0.91 | (0.48-1.75) |
| Endotracheal intubation (bag valve mask) | 2.97 | (0.85-10.39) | 3.57 | (0.9-14.17) | 2.51 | (0.6-10.55) | 2.81 | (1.10-7.21) |

---

Abbreviations: ROSC, return on spontaneous circulation; OR, Odds ratio; CI, confidence interval; aOR, adjusted odds ratio; STI, scene time interval; RTI, response time interval; TTI, transport time interval; CPR, cardiopulmonary resuscitation..

All references are shown in parentheses.
